# Supplementary material
Source: PubMed Central journal article supplement (PMC10765595)
Supplement: NIHMS1550319-supplement-1.pdf [file NIHMS1550319-supplement-1.pdf]

## Supp Fig. 1

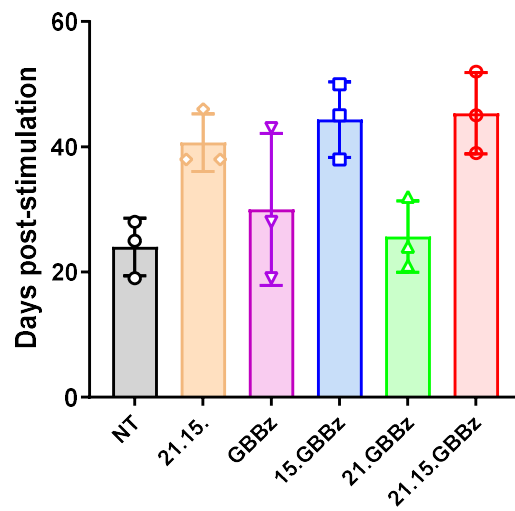

**Supplementary Figure 1. GPC3-CAR T cells co-expressing IL-21 and/or IL-15 do not undergo autonomous growth.** PBMCs were stimulated with plate bound anti-CD3/anti-CD28 antibodies and transduced.  $0.5 \times 10^6$  generated CAR T cells were cultured in the absence of exogenous cytokines and were split every 2-4 days as needed to maintain optimal culture conditions. CAR T cell viability was assessed three times a week and cell survival in number of days post-stimulation is shown (Mean,  $\pm$  SD, three independent expansions evaluating three donors).

Supp Fig. 2

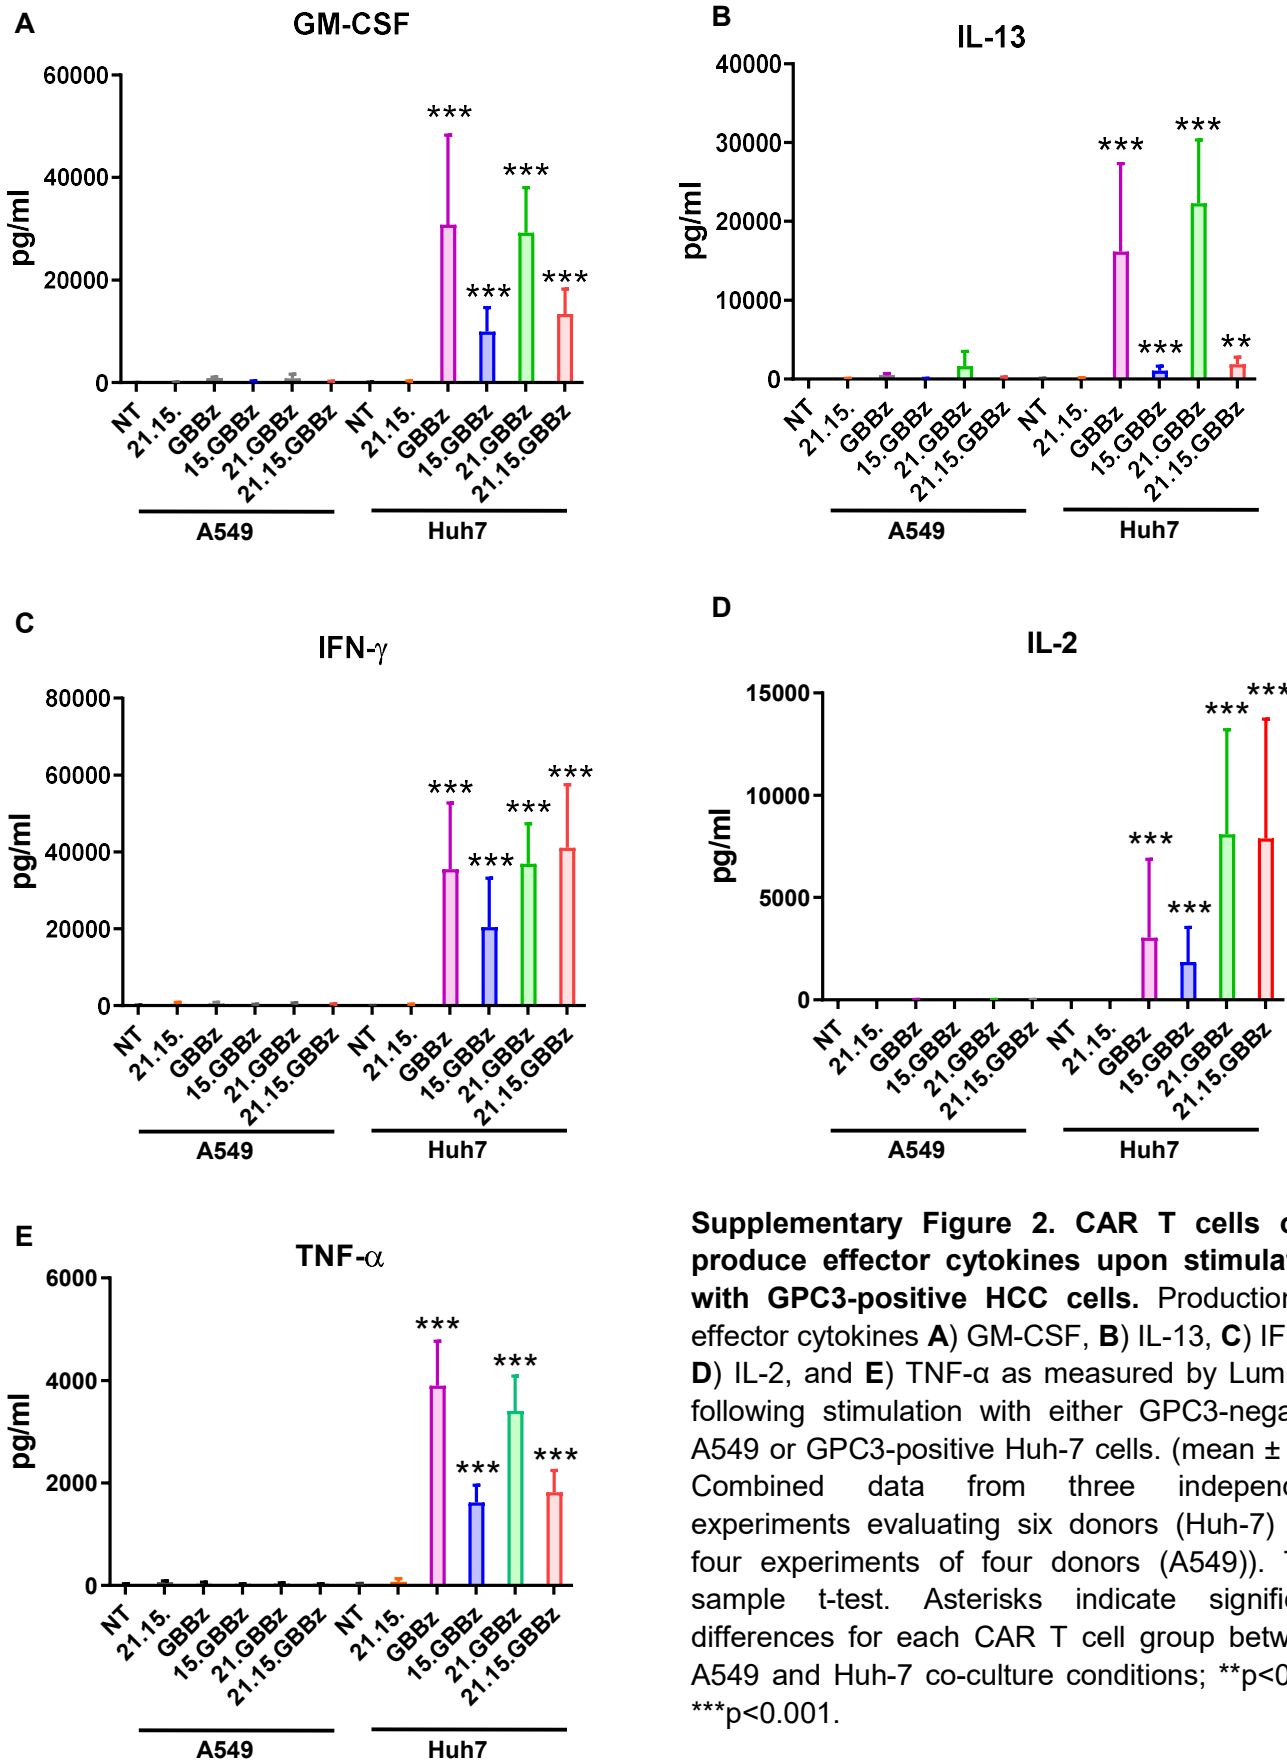

**Supplementary Figure 2. CAR T cells only produce effector cytokines upon stimulation with GPC3-positive HCC cells.** Production of effector cytokines **A)** GM-CSF, **B)** IL-13, **C)** IFN- $\gamma$ , **D)** IL-2, and **E)** TNF- $\alpha$  as measured by Luminex following stimulation with either GPC3-negative A549 or GPC3-positive Huh-7 cells. (mean  $\pm$  SD; Combined data from three independent experiments evaluating six donors (Huh-7) and four experiments of four donors (A549)). Two sample t-test. Asterisks indicate significant differences for each CAR T cell group between A549 and Huh-7 co-culture conditions; \*\* $p < 0.01$ , \*\*\* $p < 0.001$ .

### Supp Fig. 3

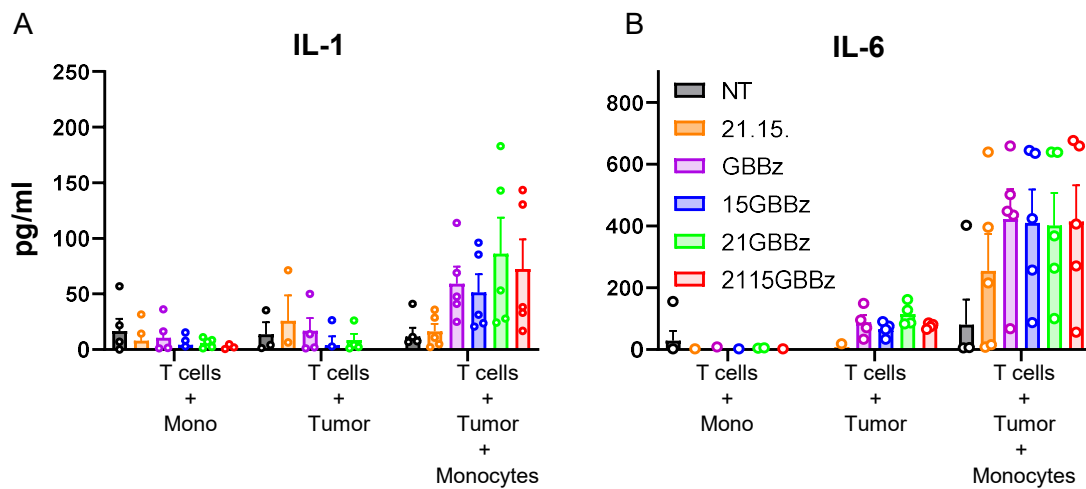

**Supplementary Figure 3. Induction of IL-1b and IL-6 production in macrophages by GPC3-CAR T cells.** Monocytes were negatively selected from human PBMCs from healthy donors and co-cultured with T cells expressing the indicated constructs with and without GPC3-positive tumor cells. Tissue culture supernatant was assessed at 48hrs for cytokine levels by ELISA. **A)** Levels of IL-1 increased in the presence of monocytes, tumor cells and CAR T cells compared to either tumor or monocyte plus CAR T cells. The IL-1b levels were similar in all four GPC3-CAR T cell groups. **B)** Levels of IL-6 also increased in the presence of monocytes, tumor cells and CAR T cells and the IL-6 levels were similar in all four GPC3-CAR T cell groups. Mean  $\pm$  SEM, three independent coculture experiments evaluating five donors.

# Supp Fig. 4

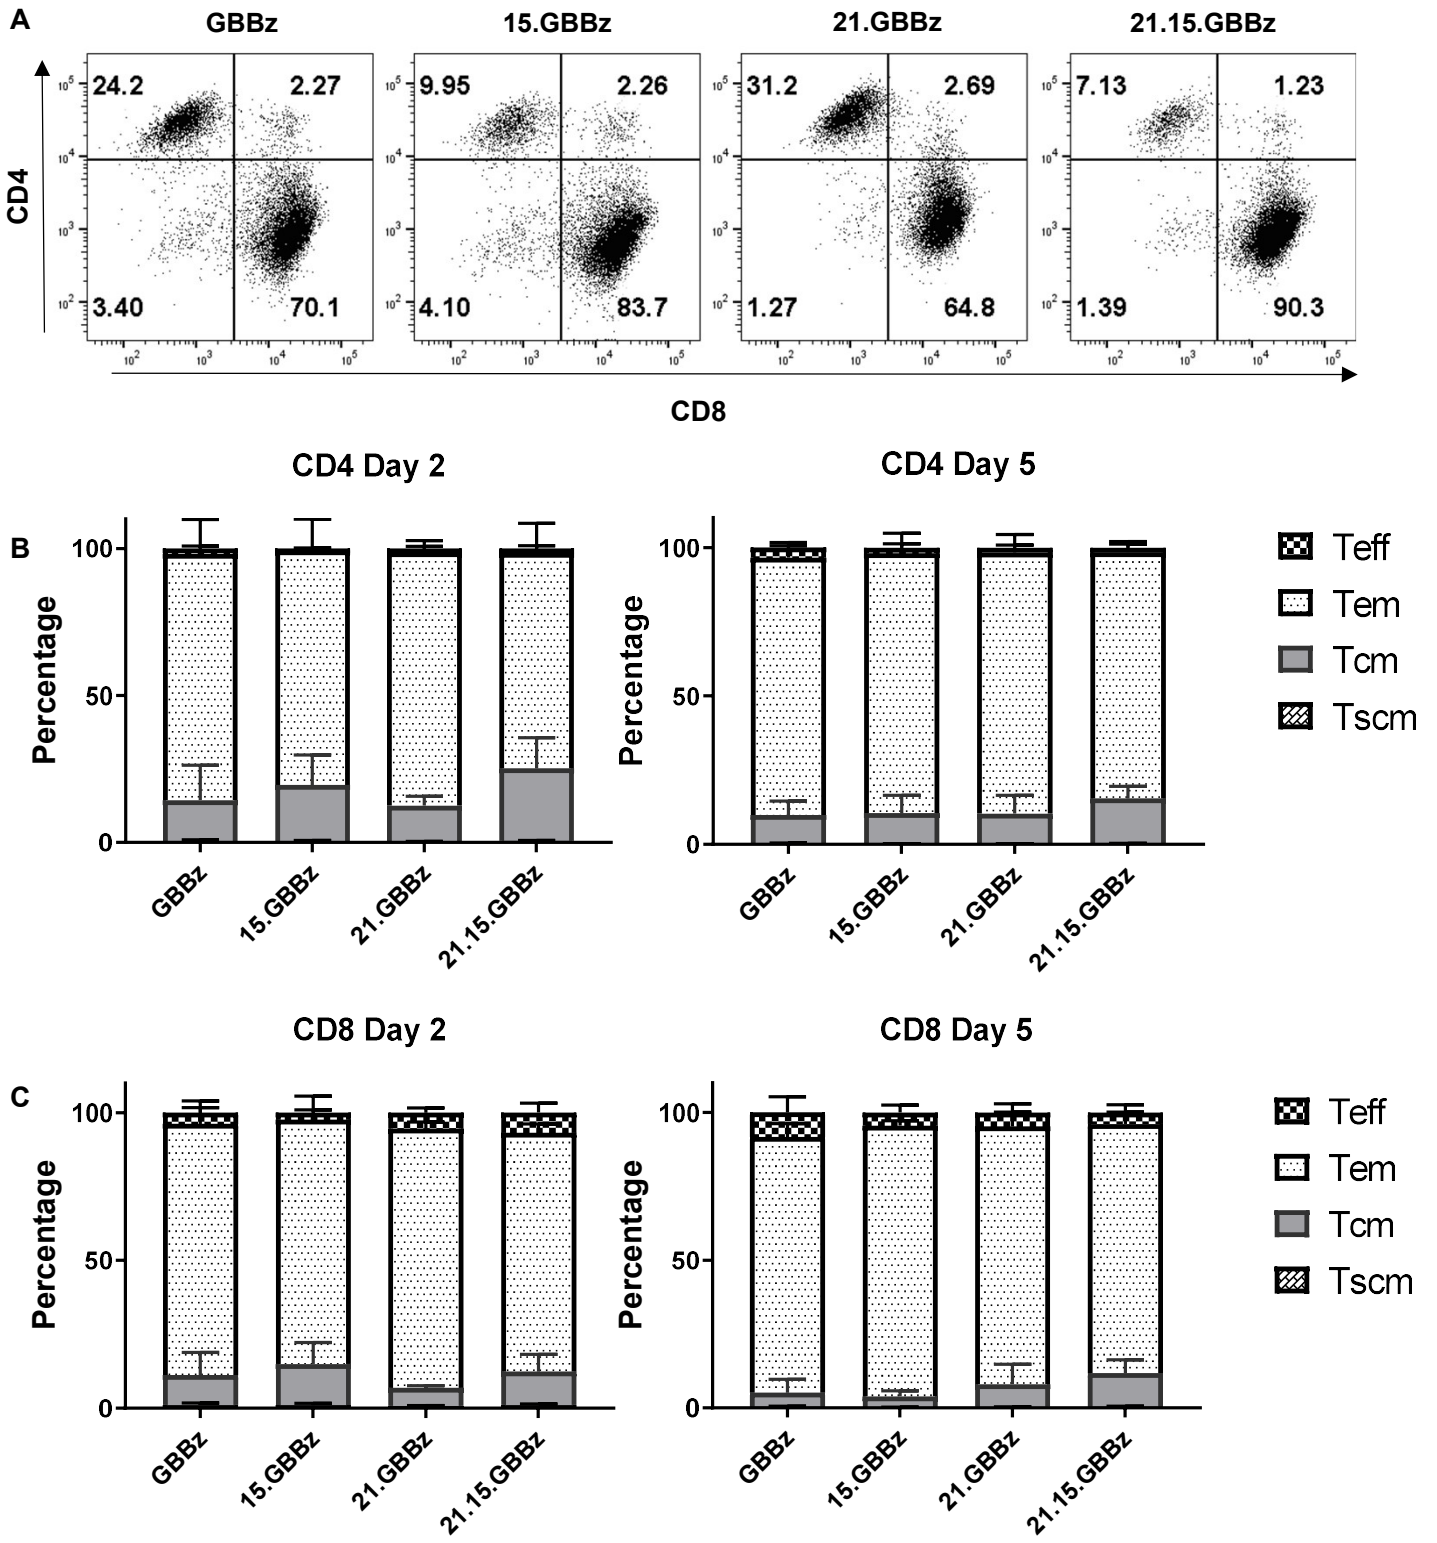

**Supplementary Figure 4. Co-expression of IL-15 alone or with IL-21 increases CD8+ population but does not influence T cell memory subset composition of GPC3-CAR T cells after tumor cell killing. A)** Representative dot plot showing expression of CD4 and CD8 by GPC3-CAR T cells after two consecutive stimulations with Huh-7 cells. **B-C)** Phenotype of GPC3-CAR T cells as measured by surface expression of CD45RO and CD62L in (B) CD4 and (C) CD8 GPC3-CAR T cell subsets following one (day 2) or two (day 5) stimulations with Huh-7 cells (mean  $\pm$  SEM, combined data from four independent experiments evaluating four donors).  $T_{scm}/T_n$ : CD45RO<sup>-</sup>/CD62L<sup>+</sup>,  $T_{cm}$ : CD45RO<sup>+</sup>/CD62L<sup>+</sup>,  $T_{em}$ : CD45RO<sup>+</sup>/CD62L<sup>-</sup>,  $T_{eff}$ : CD45RO<sup>-</sup>/CD62L<sup>-</sup>. One-way ANOVA.

Supp. Fig 5.

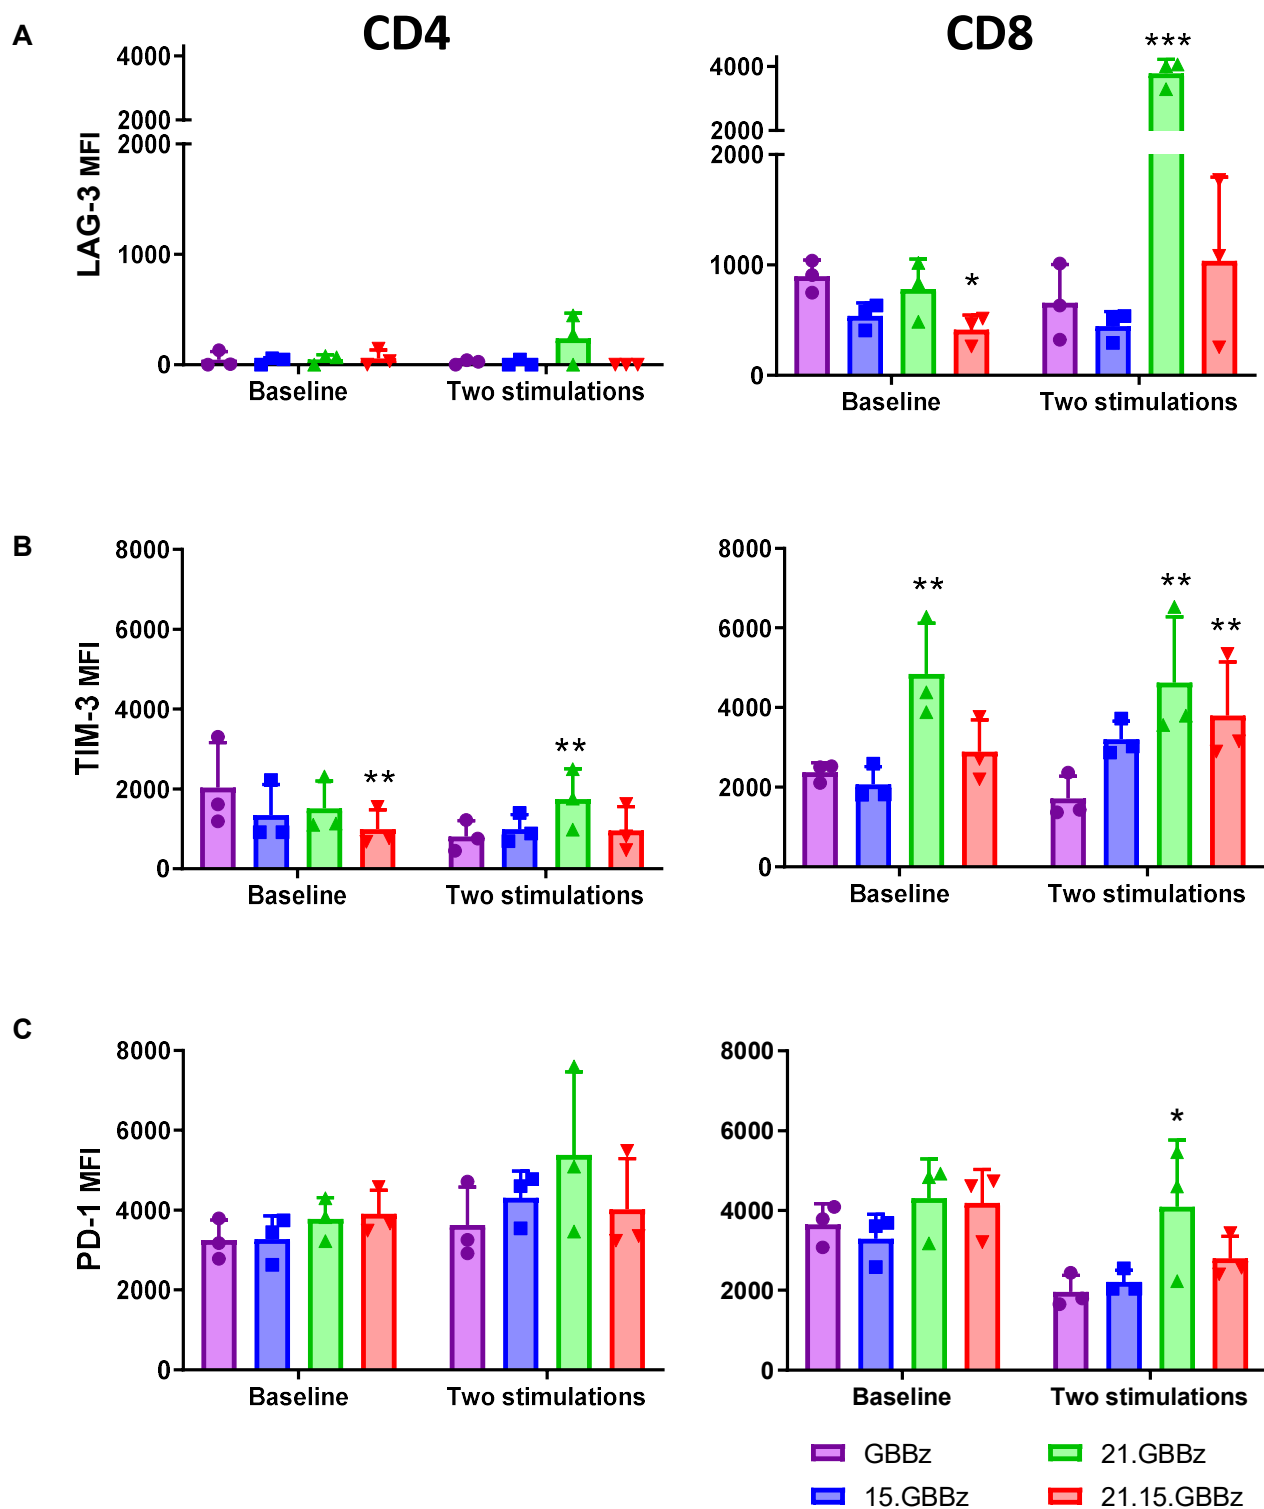

**Supplementary Figure 5. Exhaustion marker expression in GPC3-CAR T cells before and after stimulation.** Surface expression of (A) LAG-3, (B) TIM-3, and (C) PD-1 were assessed by flow cytometry post-manufacture (baseline) and after two stimulations with tumor cells (MFI  $\pm$  SD, combined data from three independent experiments evaluating three donors). Only MFI changes  $>2$  fold were considered. Two-way ANOVA. \* $p < 0.05$ , \*\* $p < 0.01$ , \*\*\* $p < 0.001$  (asterisks represent comparison to GBBz T cell group).

**Supp Fig. 6****Baseline****Post-stimulation**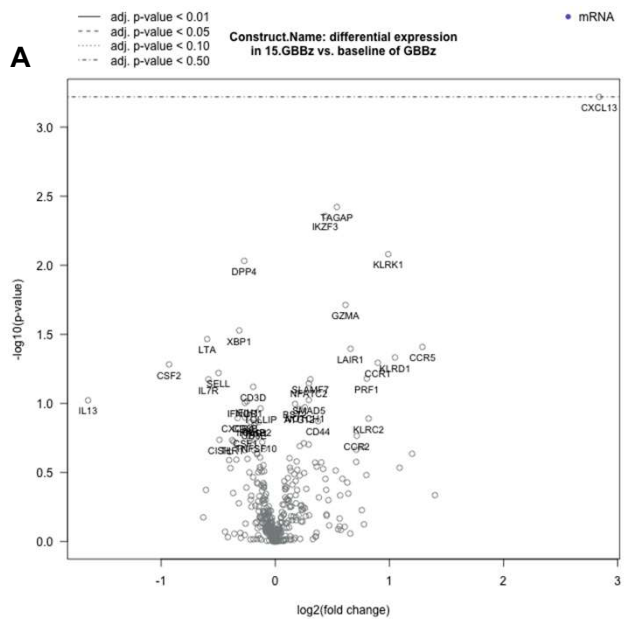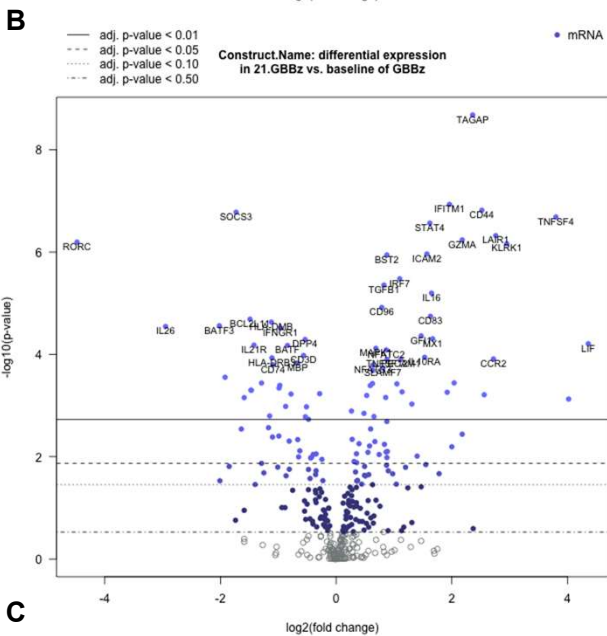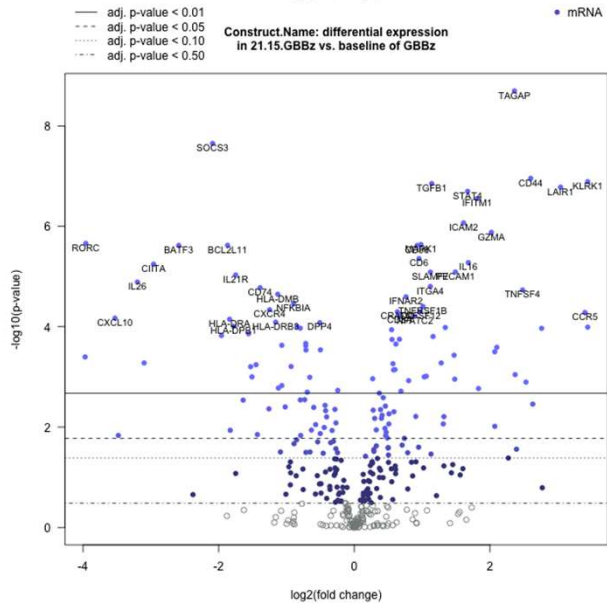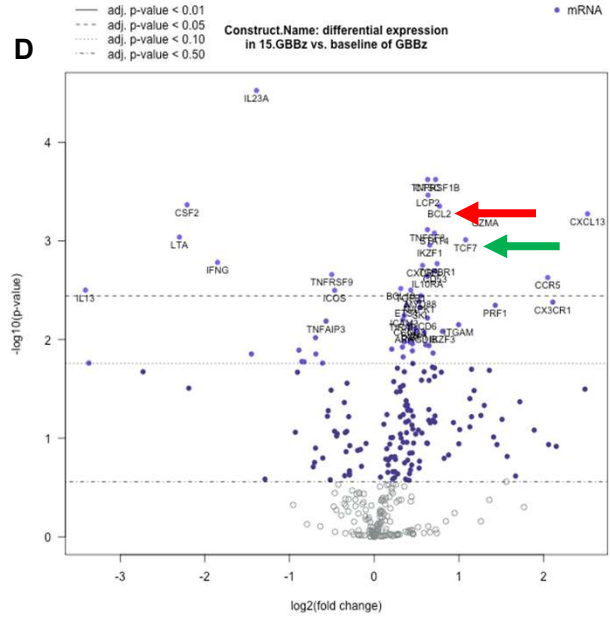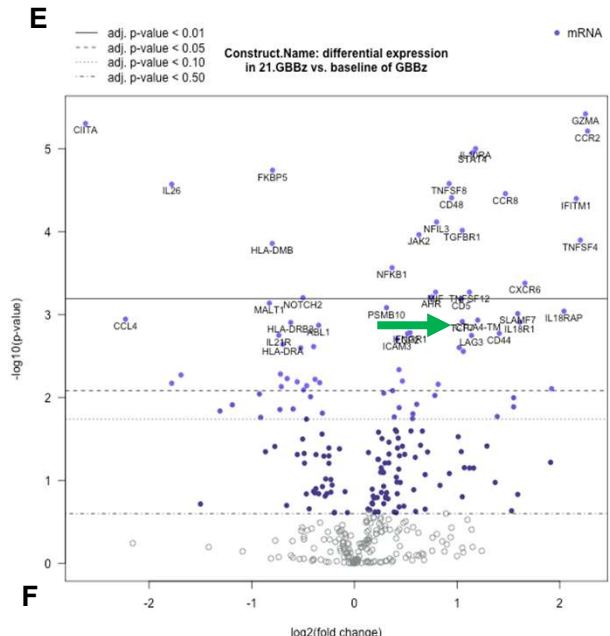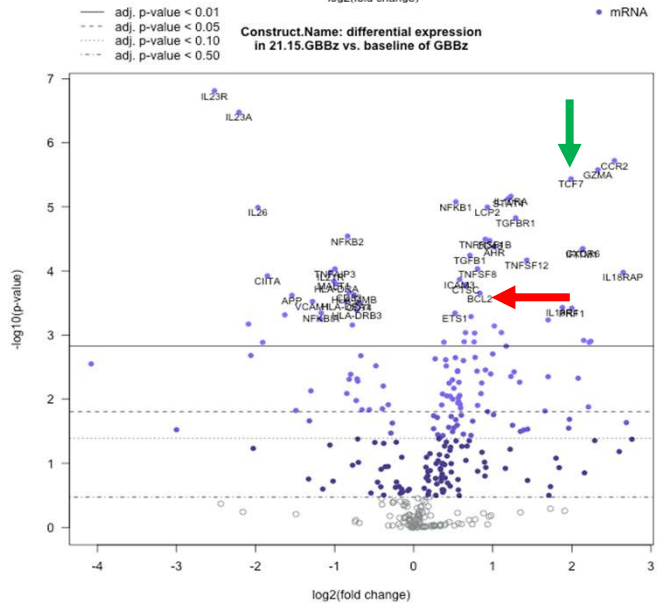

**Supplementary Figure 6 GPC3-CAR T cell gene expression profiles before and after stimulation with HCC cells.** Volcano plots showing  $\log_2$  fold changes in expression for genes post-manufacture (baseline, **A-C**) or after tumor cell killing with Huh-7 cells (post-stimulation, day 3, **D-F**) using the Nanostring™ immuno-oncology panel. Panels show comparisons of gene expression in 15.GBBz (**A, D**), 21.GBBz (**B, E**), and 21.15.GBBz (**C, F**) compared to GBBz. Adjusted p-values are represented by lines across volcano plots. Green arrow: TCF7; red arrow: BCL2. Four independent cocultures evaluating four independent donors, Nanostrings performed as a single batch.



Supp Fig. 7.

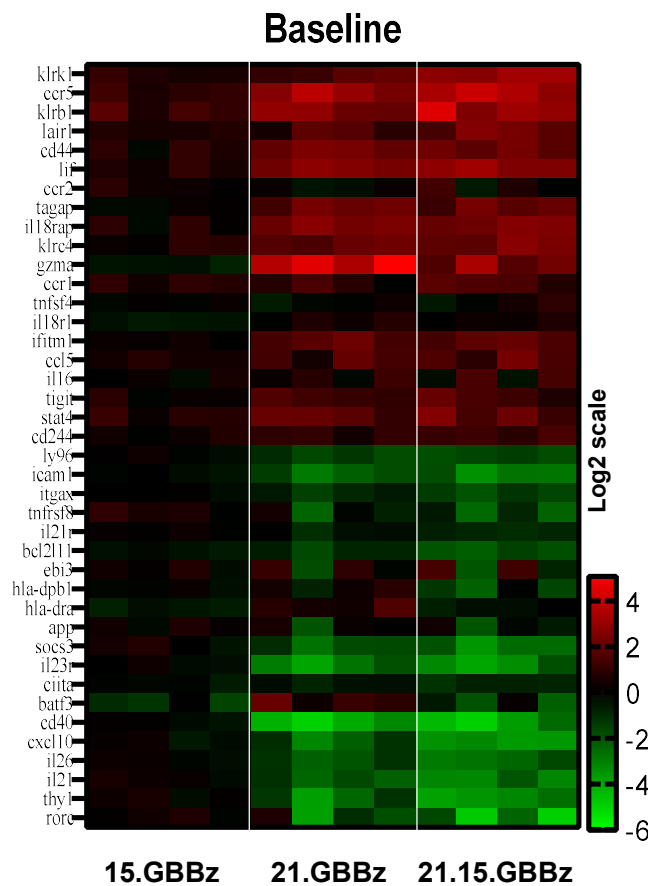

**Supplementary Figure 7. GPC3-CAR T cell expression at baseline.** Heat map showing fold expression changes for top 20 genes with most increase or decrease in expression and reaching significance versus GBBz T cells at baseline (arranged with respect to 21.15.GBBz vs GBBz). Multiple comparisons were performed after using Benjamini-Hochberg correction. Four independent cocultures evaluating four independent donors, Nanostrings performed as a single batch.

Supp Fig. 8.

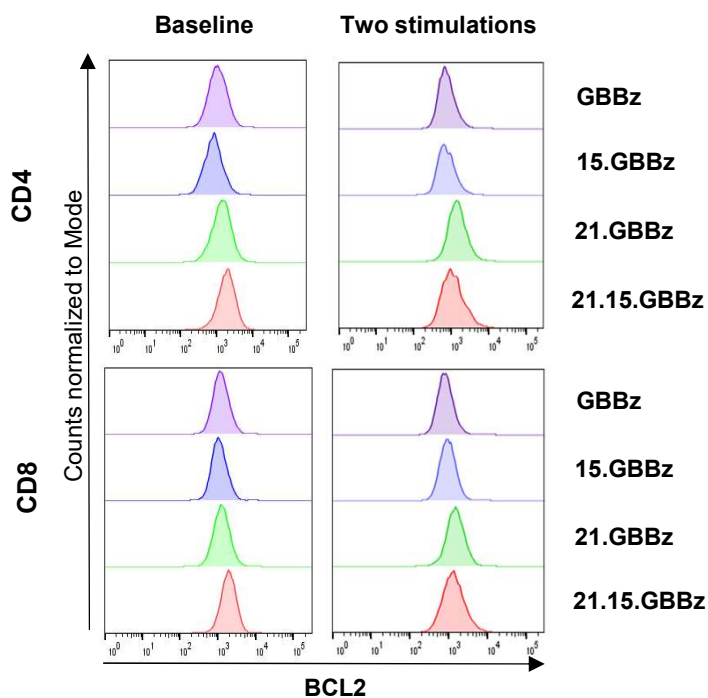

**Supplementary Figure 8: BCL-2 expression in GPC3-CAR T cells:** BCL-2 protein expression within CD4 and CD8 subsets of GPC3-CAR T cells was measured by intracellular flow cytometry. Representative histograms are shown for two independent measurements of indicated constructs.

## Supp Fig. 8

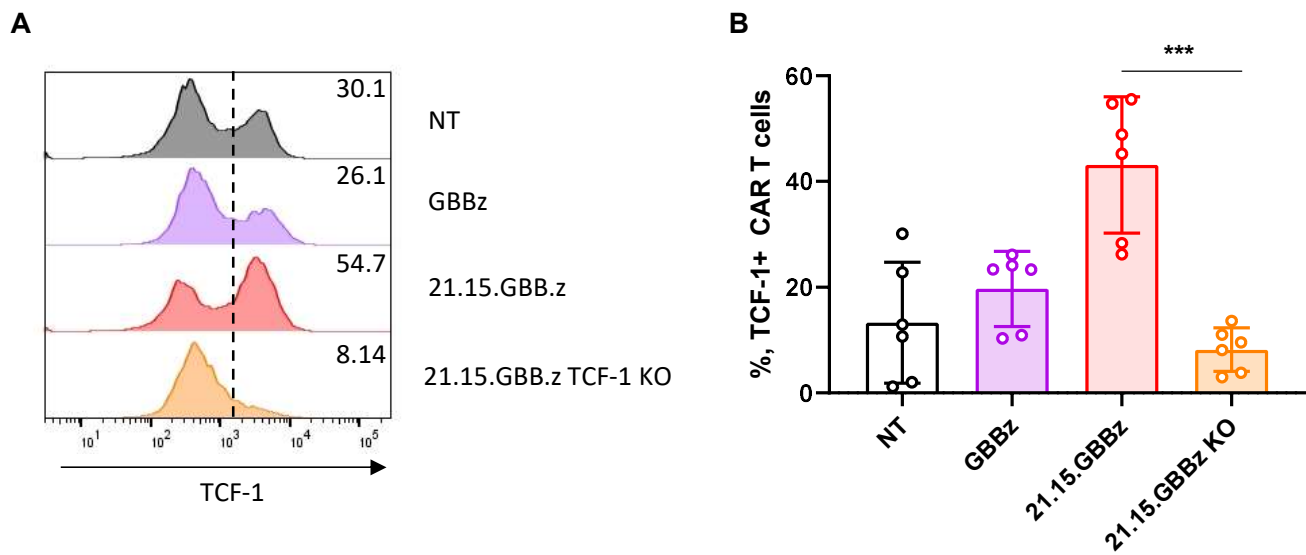

**Supplementary Figure 9 Efficiency of *TCF7* knock out:** After CRISPR/Cas9 mediated *TCF7* knock out, intracellular TCF-1 expression was measured by FACS. **A)** Representative histogram showing TCF-1 expression of indicated constructs of one donor. **B)** Combined results from six donors from three independent expansions (mean  $\pm$  SD, student's T-test, \*\*\* $<$ 0.001).

Supp. Fig 9.

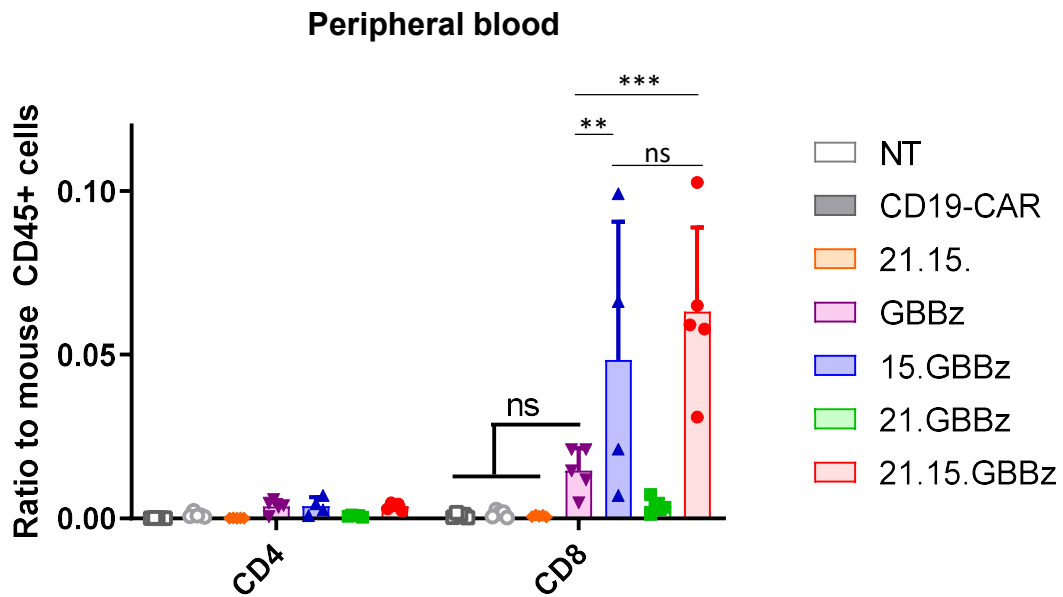

**Supplementary Figure 10. GPC3-CAR T cells are detected in the peripheral blood of tumor-bearing mice 15 days after adoptive transfer.** Frequencies of CD4 and CD8 GPC3-CAR T cells in the peripheral blood of treated mice were measured by flow cytometry 15 days after injection. Ratio to mouse CD45 expressing cells is shown (mean  $\pm$  SD, five mice per group). One-way ANOVA, \*\*  $p < 0.01$ , \*\*\*  $p < 0.001$ .

Supp Fig. 10.

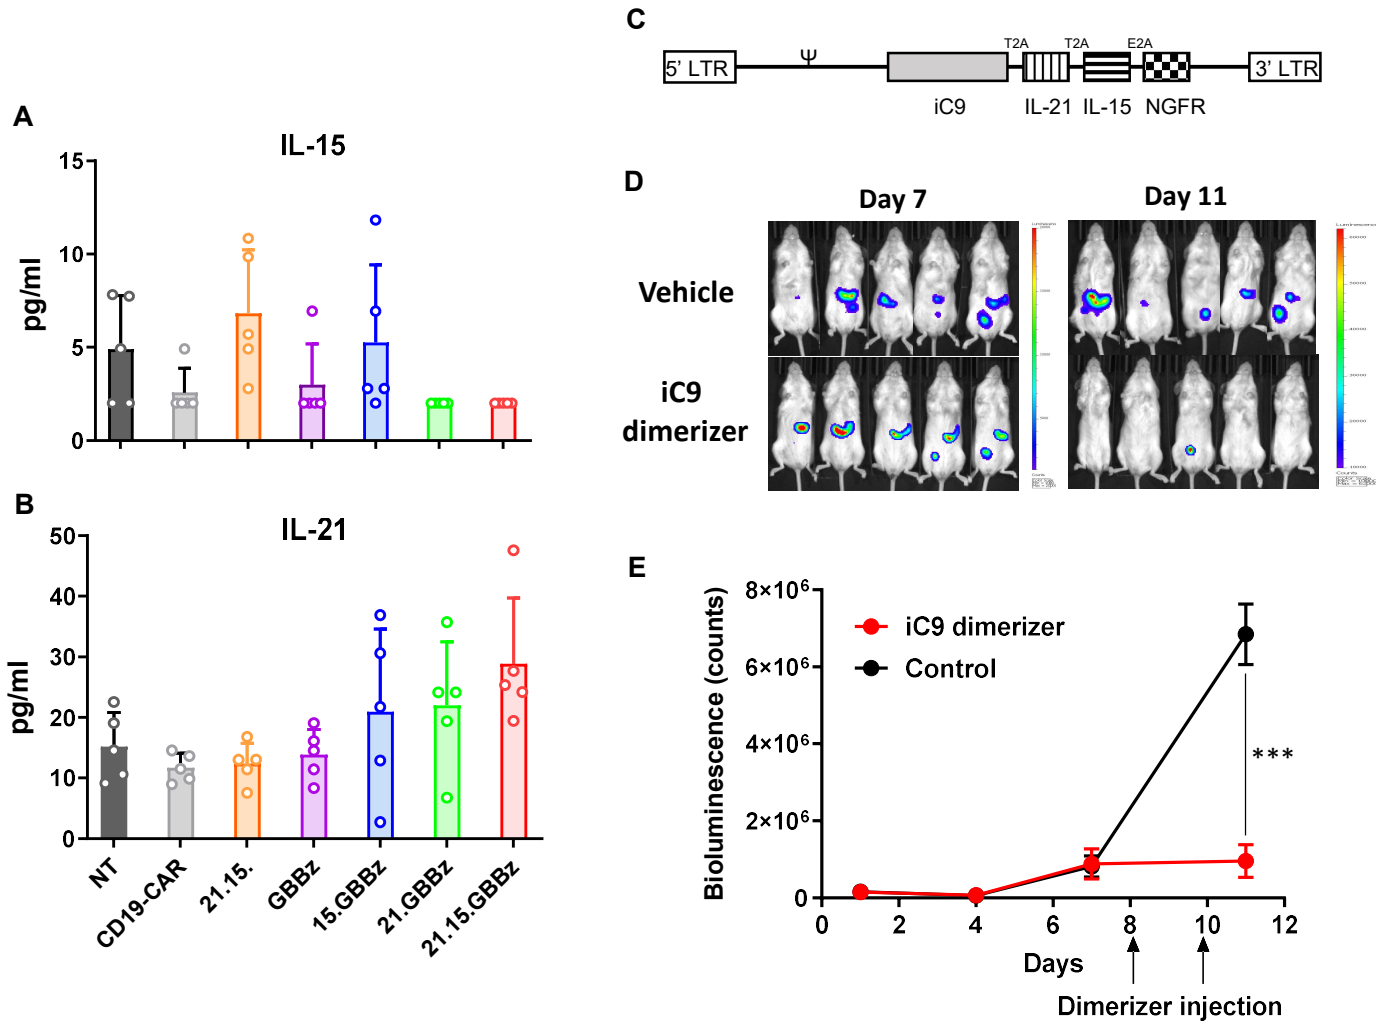

**Supplementary Figure 11. In vivo safety assessment of GPC3-CAR T cells co-expressing IL-15 and/or -21. A-B)** Tumor bearing mice were injected with indicated GPC3-CAR T cell groups intravenously and serum cytokine levels were measured by ELISA on Day 15 (Mean + SD, n=5). No difference was found when comparing levels with One-way ANOVA. **C)** Schematic map iC9.21.15.NGFR. This construct was used to co-transduce T cells with GBBz and Ffluc and evaluate iC9's ability to eliminate 21.15. expressing CAR T cells. **D)** Bioluminescence images at indicated timepoints before and after administration of AP20187 (iC9 dimerizer). **E)** Bioluminescence counts over time indicating the efficiency of iC9 to eliminate IL-21 and -15 expressing cells (Mean ± SD, five mice per group).

Supp. Fig 11.

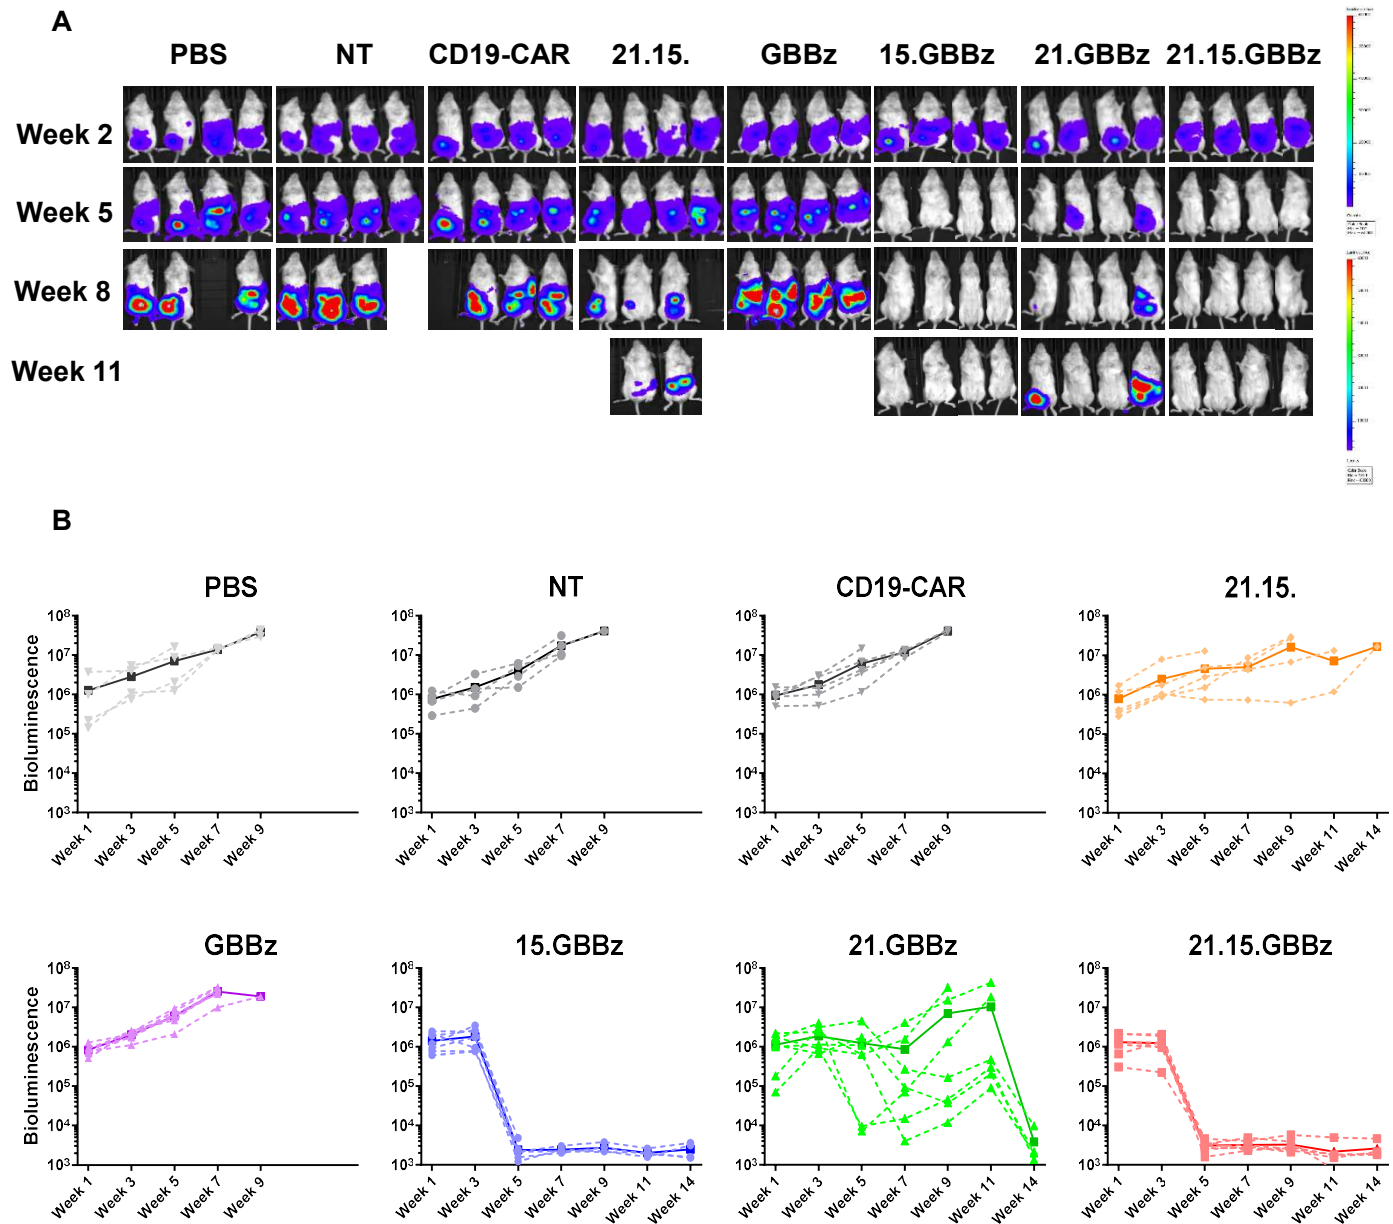

**Supplementary Figure 12. 15.GBBz T cells generate a comparable anti-tumor response to 21.15.GBBz in malignant rhabdoid tumor (MRT, G401) xenograft-bearing mice.** NSG mice (n=4-8) were injected with  $5 \times 10^6$  Ffluc+ G401 cells followed by  $5 \times 10^5$  GPC3-CAR T cells on day 14. **A)** Weekly monitoring of bioluminescent G401 tumor cells. **B)** Tumor bioluminescence counts over time for each group. Dashed lines represent bioluminescence of each animal, solid lines represent mean bioluminescence for the indicated treatment group.

Supp. Fig 12.

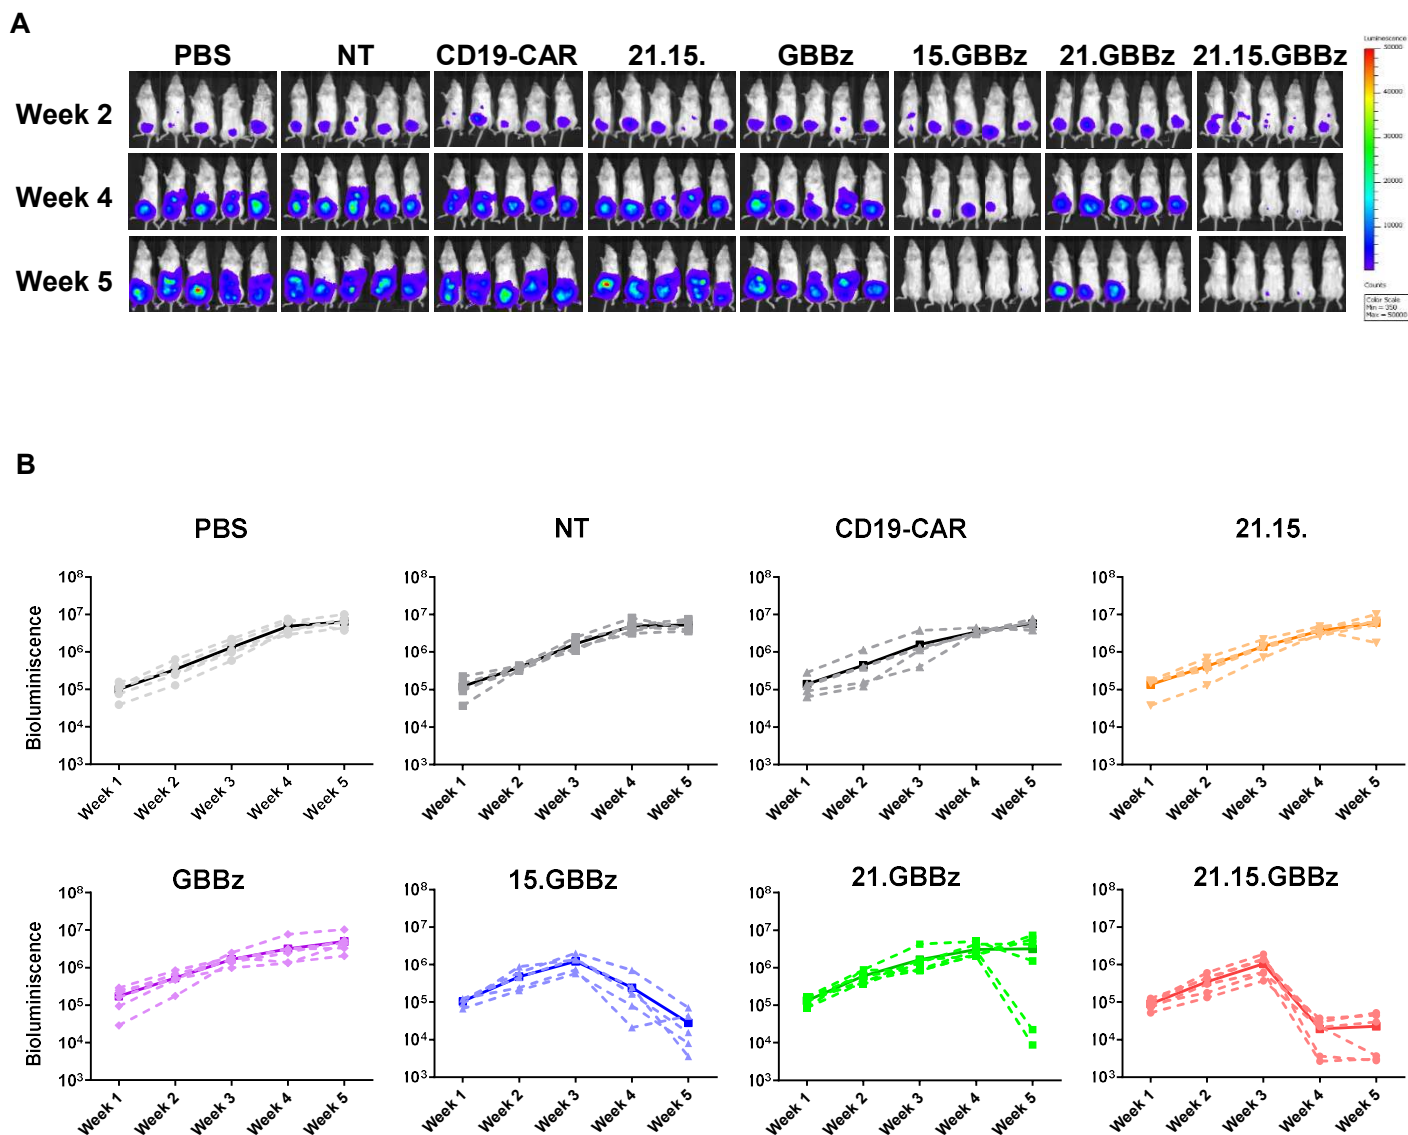

**Supplementary Figure 13. 15.GBBz T cells generate a comparable anti-tumor response to 21.15.GBBz T cells at a  $2 \times 10^6$  dose in HCC xenograft-bearing mice.** NSG mice ( $n=5$ ) were injected with  $2 \times 10^6$  Ffluc+ Huh-7 cells followed by  $2 \times 10^6$  GPC3-CAR T cells on day 14. **A)** Weekly monitoring of bioluminescent Huh-7 tumor cells. **B)** Tumor bioluminescence counts over time for each group. Dashed lines represent bioluminescence of each animal, solid lines represent mean bioluminescence for the indicated treatment group.
